# Supplementary figures and images for: Pretransplant sequential hypo‐ and normothermic machine perfusion of suboptimal livers donated after circulatory death using a hemoglobin‐based oxygen carrier perfusion solution
Source: PubMed Central journal article supplement — Am J Transplant. 2019 Jan 23;19(4):1202–11. doi: 10.1111/ajt.15228 (PMC6590255; doi:10.1111/ajt.15228), 2019-01-23

**A**

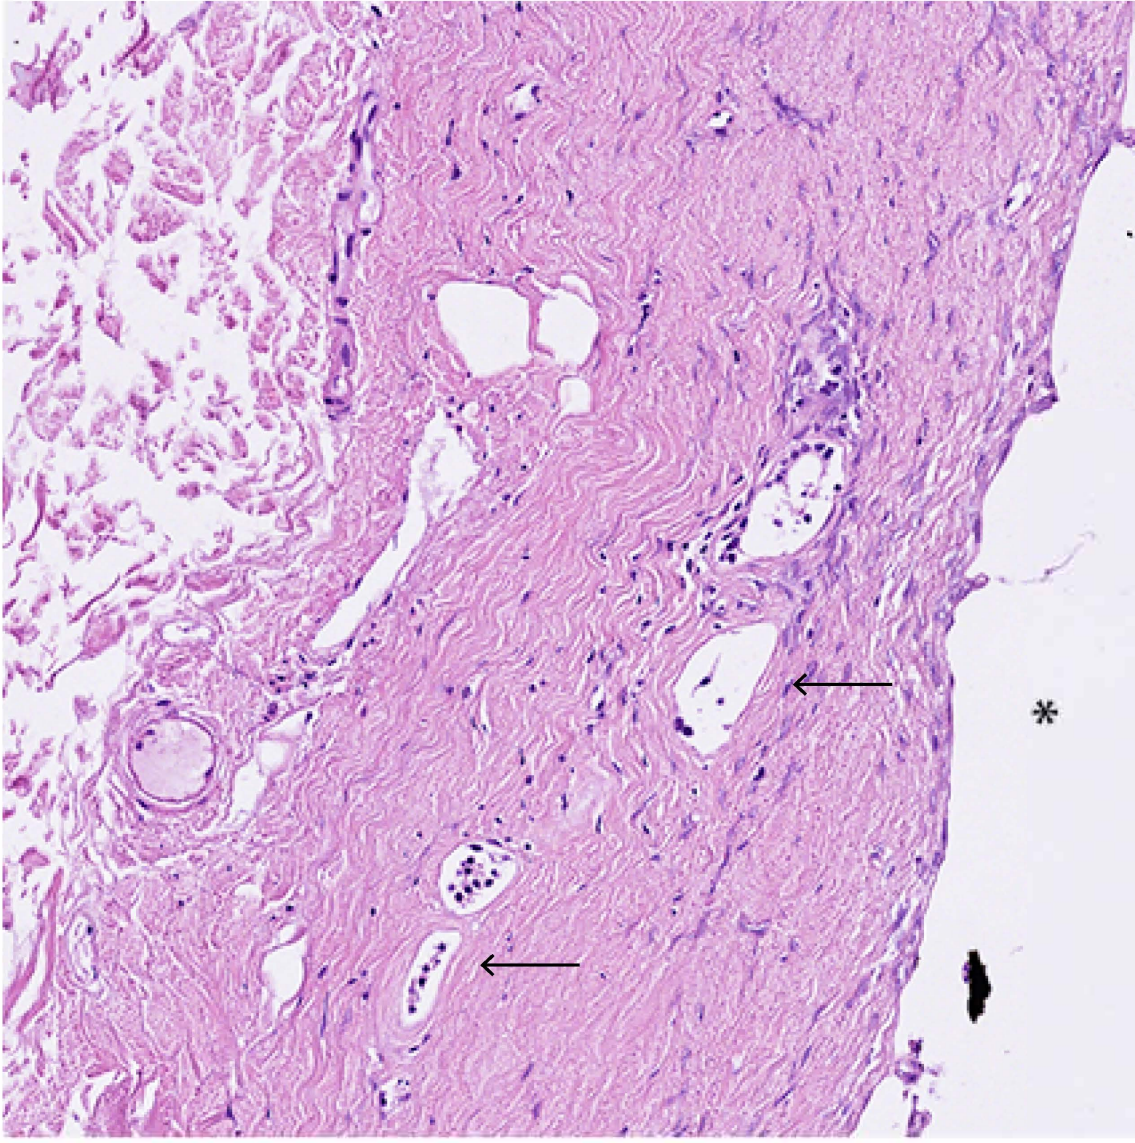

**B**

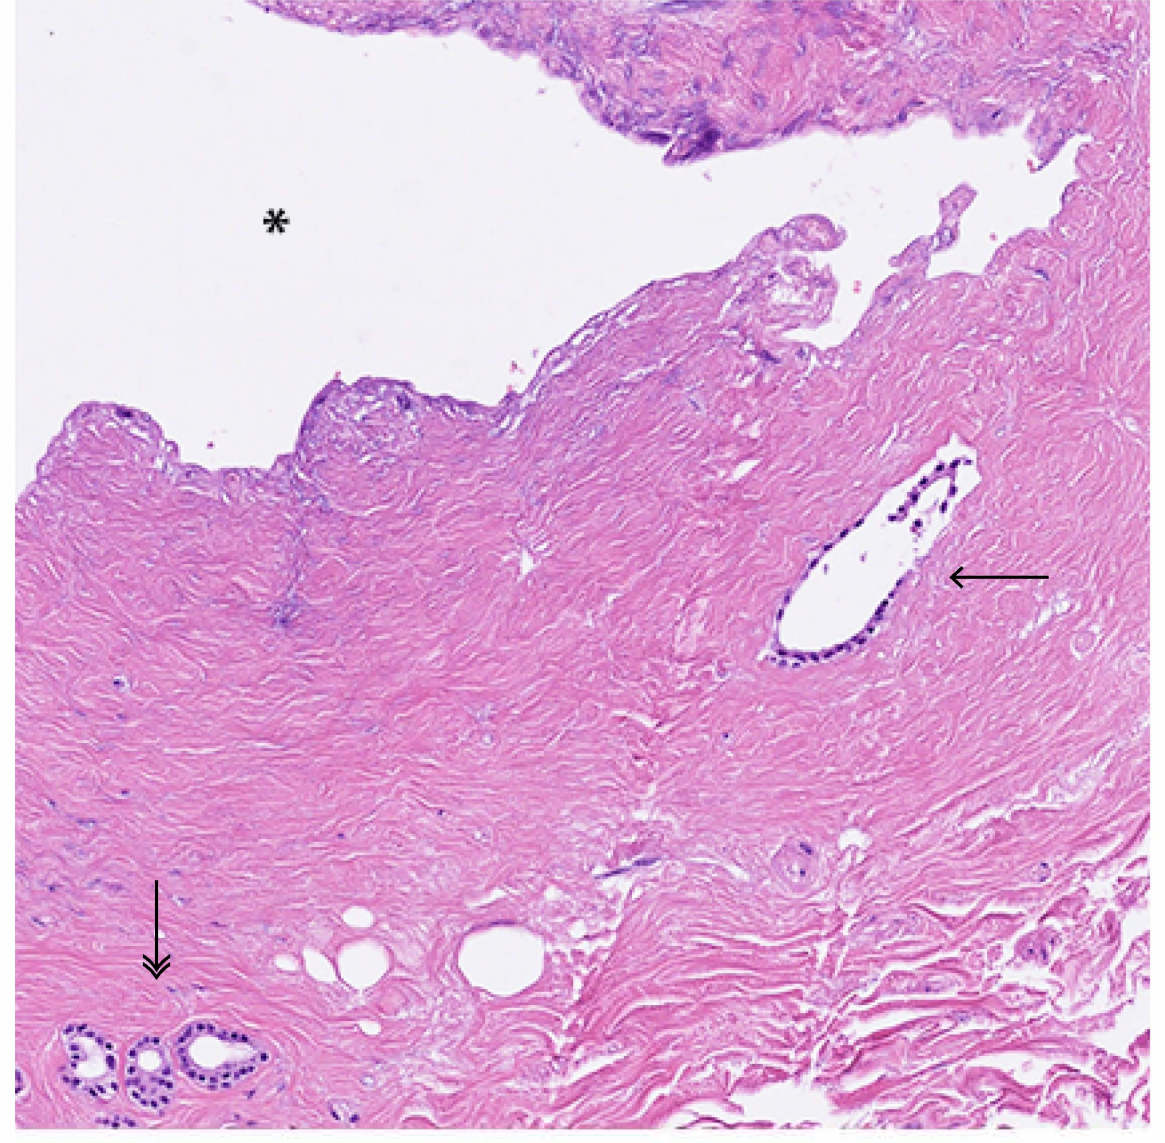

**Figure S2**

Supplement: AJT-19-1202-s002.pdf [file AJT-19-1202-s002.pdf]

Figure S3

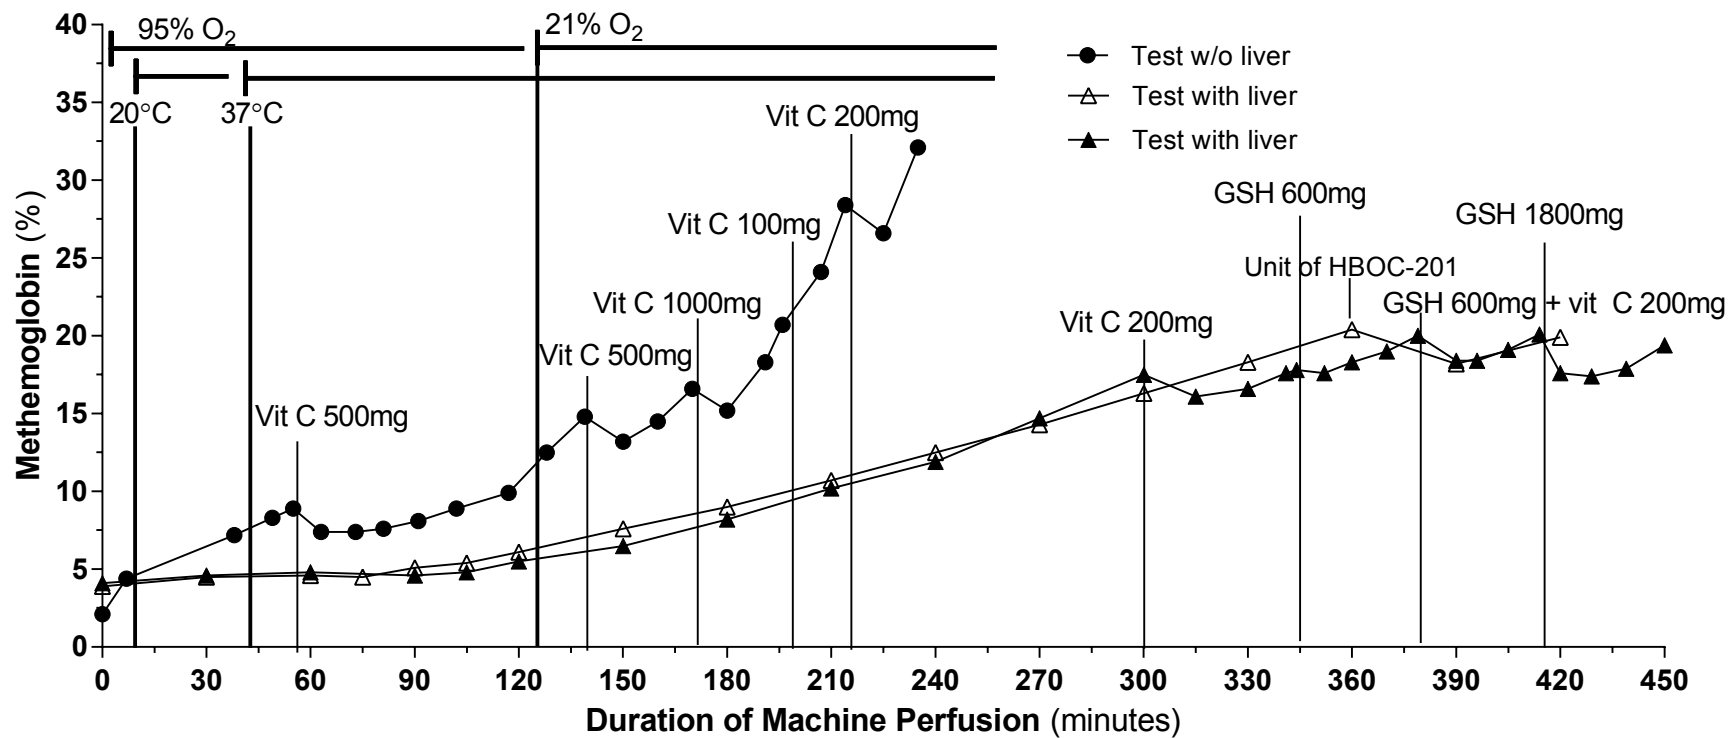

Supplement: AJT-19-1202-s003.pdf [file AJT-19-1202-s003.pdf]
